# Supplementary material for: Crystal structures of the Bacillus subtilis prophage lytic cassette proteins XepA and YomS
Source: PubMed Central journal article supplement (PMC6834076; doi:10.1107/s2059798319013330), 2019-11-01
Supplement: d-75-01028-sup1.pdf [file d-75-01028-sup1.pdf]

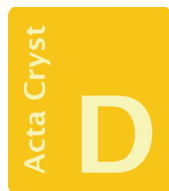

STRUCTURAL  
BIOLOGY

**Volume 75 (2019)**

**Supporting information for article:**

**Crystal structures of the *Bacillus subtilis* prophage lytic cassette proteins XepA and YomS**

**Stefanie Freitag-Pohl, Andrius Jasilionis, Maria Håkansson, L. Anders Svensson, Rebeka Kovačič, Martin Welin, Hildegard Watzlawick, Lei Wang, Josef Altenbuchner, Magdalena Płotka, Anna Karina Kaczorowska, Tadeusz Kaczorowski, Eva Nordberg Karlsson, Salam Al-Karadaghi, Björn Walse, Arnthór Aevarsson and Ehmke Pohl**

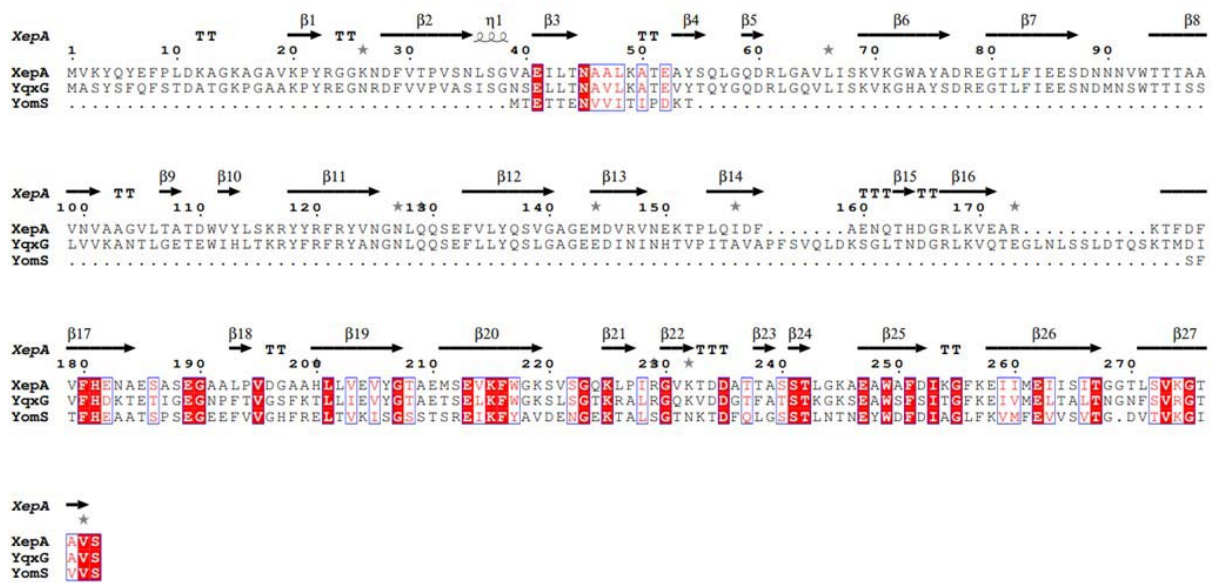

**Figure S1** Sequence alignment of the putative lysins XepA, YomS and YqxG. The secondary structure annotation in the top line is based on the crystal structure of XepA presented here.

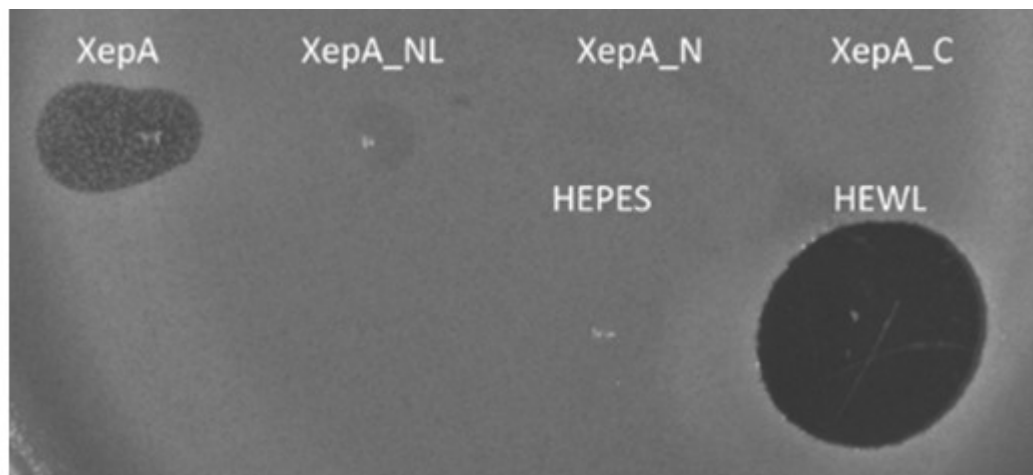

**Figure S2** Cytotoxicity of XepA truncated variants. *In vivo* assays of XepA truncated variants XepA\_NL, XepA\_N and XepA\_C on *Bacillus megaterium* ATCC 14581. Wild-type XepA and HEWL served as positive controls, HEPES buffer (20 mM, pH 7.4) was used as a negative control. Out of three truncated XepA variants tested, only XepA\_NL shows minimal activity.

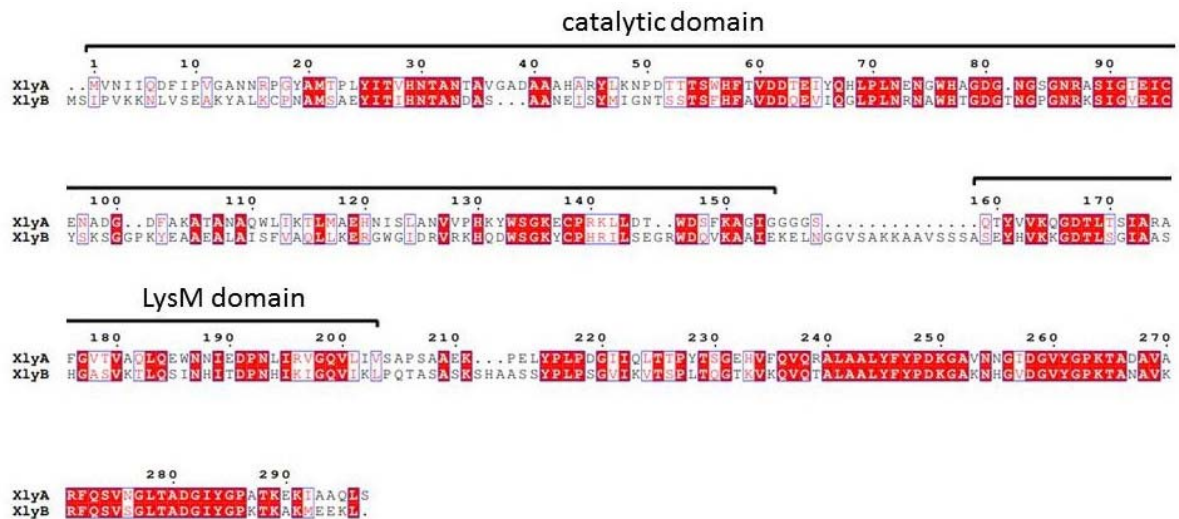

**Figure S3** Sequence alignment of the lysins XlyA and XlyB with ClustalW (Larkin et al. 2007) and ESPript (Robert & Gouet, 2014). The residues corresponding to the cell wall binding LysM domain are 159 to 203 (XlyA) and 177 to 222 (XlyB).

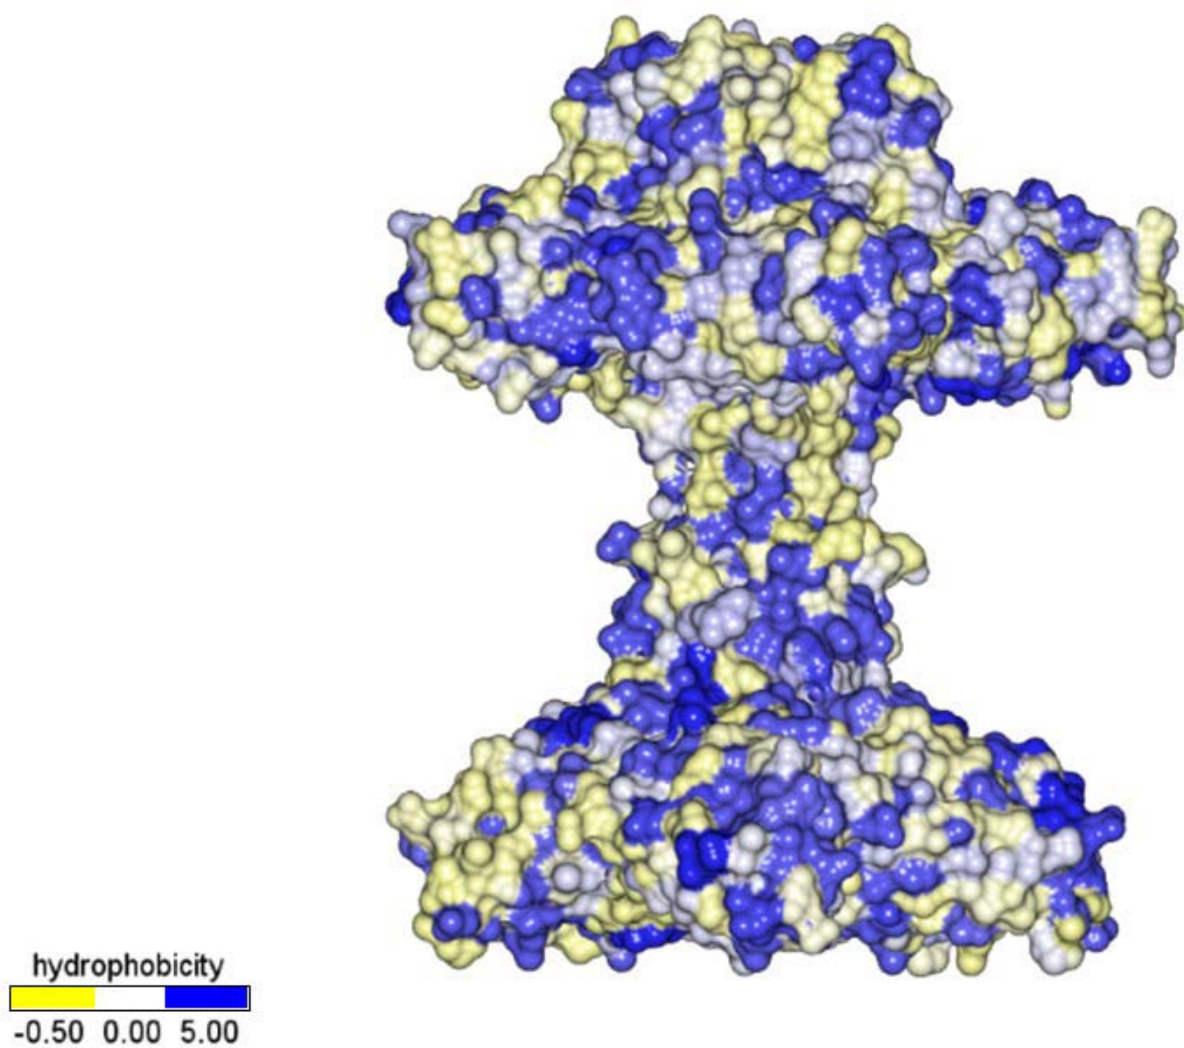

**Figure S4** Surface representation of hydrophobicity of the XepA pentamer for its side view (CCP4mg) shows that the linker region is not entirely hydrophobic and thus does not resemble a trans-membrane region.
